# Supplementary material for: A Comparative Analysis of Influenza-Associated Disease Burden with Different Influenza Vaccination Strategies for the Elderly Population in South Korea
Source: MDPI journal article supplement (doi:10.3390/vaccines10091387), 2022-08-25
Supplement: s1 [file s1]

Supplementary Materials for:

## A Comparative Analysis of Influenza-Associated Disease Burden with Different Influenza Vaccination Strategies for the Elderly Population in South Korea

Min Joo Choi <sup>1</sup>, Jae-Won Yun <sup>2</sup>, Joon Young Song <sup>2,3</sup>, Karam Ko <sup>4</sup>, Joaquin F. Mould <sup>5</sup>  
and Hee Jin Cheong <sup>2,3,\*</sup>

<sup>1</sup> Department of Internal Medicine, International St. Mary's Hospital, Catholic Kwandong University College of Medicine, Incheon 22711, Korea

<sup>2</sup> Asia Pacific Influenza Institute, Korea University College of Medicine, Seoul 08308, Korea

<sup>3</sup> Department of Internal Medicine, Guro Hospital, Korea University College of Medicine, Seoul 08308, Korea

<sup>4</sup> Seqirus Korea Ltd., Seoul 03157, Korea

<sup>5</sup> Seqirus USA Inc., Summit, NJ 07901, USA

\* Correspondence: heejinmd@korea.ac.kr

**Table S1:** Sensitivity analysis parameter

| Parameter name (range)                                                      | Base-case values | Lower Limit | Upper limit | Type of Distribution |
|-----------------------------------------------------------------------------|------------------|-------------|-------------|----------------------|
| Influenza infection incidence rate among low-risk unvaccinated 65y+         | 7.2%             | 4.3%        | 12.0%       | Beta                 |
| Probability of hospitalization for low-risk without complication in 65-74y  | 0.4%             | 0.4%        | 0.4%        | Beta                 |
| Probability of hospitalization for low-risk without complication in 75-84y  | 0.5%             | 0.4%        | 0.5%        | Beta                 |
| Probability of hospitalization for low-risk without complication in ≥85y    | 0.8%             | 0.7%        | 0.9%        | Beta                 |
| Probability of hospitalization for low-risk with complication in 65-74y     | 4.8%             | 4.3%        | 5.3%        | Beta                 |
| Probability of hospitalization for low-risk with complication in 75-84y     | 8.9%             | 8.0%        | 9.8%        | Beta                 |
| Probability of hospitalization for low-risk with complication in ≥85y       | 15.2%            | 13.7%       | 16.7%       | Beta                 |
| Probability of hospitalization for high-risk without complication in 65-74y | 1.8%             | 1.6%        | 2.0%        | Beta                 |
| Probability of hospitalization for high-risk without complication in 75-84y | 2.3%             | 2.1%        | 2.6%        | Beta                 |
| Probability of hospitalization for high-risk without complication in ≥85y   | 3.9%             | 3.5%        | 4.3%        | Beta                 |
| Probability of hospitalization for high-risk with complication in 65-74y    | 43.6%            | 39.2%       | 47.9%       | Beta                 |

|                                                                          |       |       |        |        |
|--------------------------------------------------------------------------|-------|-------|--------|--------|
| Probability of hospitalization for high-risk with complication in 75-84y | 56.2% | 50.6% | 61.8%  | Beta   |
| Probability of hospitalization for high-risk with complication in ≥85y   | 65.6% | 59.1% | 72.2%  | Beta   |
| QIV vaccine effectiveness against H1N1 in the Elderly population         | 62.0% | 36.0% | 79.0%  | Normal |
| QIV vaccine effectiveness against H3N2 in the Elderly population         | 24.0% | 0.0%  | 45.0%  | Normal |
| QIV vaccine effectiveness against B in the Elderly population            | 63.0% | 33.0% | 79.0%  | Normal |
| aQIV vs QIV relative effectiveness                                       | 13.9% | 4.2%  | 23.5%  | Normal |
| aQIV vs HD-QIV relative effectiveness                                    | 3.2%  | -2.5% | 8.9%   | Normal |
| Vaccination coverage 65–74 years population                              | 80.0% | 72.0% | 100.0% | Beta   |
| Vaccination coverage 75–84 years population                              | 80.0% | 72.0% | 100.0% | Beta   |
| Vaccination coverage 85+ years population                                | 80.0% | 72.0% | 100.0% | Beta   |

| Parameter name (range)                                                      | Base-case values | Lower Limit | Upper limit | Type of Distribution |
|-----------------------------------------------------------------------------|------------------|-------------|-------------|----------------------|
| Probability of comorbidities for 65–74 years population in Korea            | 16.6%            | 14.9%       | 18.3%       | Beta                 |
| Probability of comorbidities for 75–84 years population in Korea            | 23.6%            | 21.2%       | 26.0%       | Beta                 |
| Probability of comorbidities for 85+ years population in Korea              | 25.7%            | 23.1%       | 28.3%       | Beta                 |
| Probability of death for low-risk inpatient without complication in 65-74y  | 0.3%             | 0.2%        | 0.3%        | Beta                 |
| Probability of death for low-risk inpatient without complication in 75-84y  | 0.3%             | 0.3%        | 0.4%        | Beta                 |
| Probability of death for low-risk inpatient without complication in ≥85y    | 1.8%             | 1.6%        | 1.9%        | Beta                 |
| Probability of death for low-risk inpatient with complication in 65-74y     | 1.3%             | 1.2%        | 1.4%        | Beta                 |
| Probability of death for low-risk inpatient with complication in 75-84y     | 2.1%             | 1.9%        | 2.3%        | Beta                 |
| Probability of death for low-risk inpatient with complication in ≥85y       | 7.3%             | 6.6%        | 8.0%        | Beta                 |
| Probability of death for high-risk inpatient without complication in 65-74y | 2.4%             | 2.2%        | 2.6%        | Beta                 |
| Probability of death for high-risk inpatient without complication in 75-84y | 3.2%             | 2.9%        | 3.5%        | Beta                 |
| Probability of death for high-risk inpatient without complication in ≥85y   | 5.9%             | 5.3%        | 6.5%        | Beta                 |

|                                                                                 |       |       |       |      |
|---------------------------------------------------------------------------------|-------|-------|-------|------|
| Probability of death for high-risk inpatient with complication in 65-74y        | 4.0%  | 3.6%  | 4.4%  | Beta |
| Probability of death for high-risk inpatient with complication in 75-84y        | 7.2%  | 6.5%  | 7.9%  | Beta |
| Probability of death for high-risk inpatient with complication in $\geq 85y$    | 16.0% | 14.4% | 17.5% | Beta |
| Probability of death for low-risk outpatient without complication in 65-74y     | 0.0%  | 0.0%  | 0.0%  | Beta |
| Probability of death for low-risk outpatient without complication in 75-84y     | 0.1%  | 0.1%  | 0.1%  | Beta |
| Probability of death for low-risk outpatient without complication in $\geq 85y$ | 0.6%  | 0.6%  | 0.7%  | Beta |
| Probability of death for low-risk outpatient with complication in 65-74y        | 0.1%  | 0.1%  | 0.1%  | Beta |
| Probability of death for low-risk outpatient with complication in 75-84y        | 0.2%  | 0.2%  | 0.3%  | Beta |
| Probability of death for low-risk outpatient with complication in $\geq 85y$    | 1.7%  | 1.5%  | 1.9%  | Beta |
| Probability of death for high-risk outpatient without complication in 65-74y    | 0.4%  | 0.3%  | 0.4%  | Beta |

| Parameter name (range)                                                           | Base-case values | Lower Limit | Upper limit | Type of Distribution |
|----------------------------------------------------------------------------------|------------------|-------------|-------------|----------------------|
| Probability of death for high-risk outpatient without complication in 75-84y     | 1.1%             | 1.0%        | 1.2%        | Beta                 |
| Probability of death for high-risk outpatient without complication in $\geq 85y$ | 3.3%             | 3.0%        | 3.7%        | Beta                 |
| Probability of death for high-risk outpatient with complication in 65-74y        | 1.6%             | 1.5%        | 1.8%        | Beta                 |
| Probability of death for high-risk outpatient with complication in 75-84y        | 3.3%             | 3.0%        | 3.7%        | Beta                 |
| Probability of death for high-risk outpatient with complication in $\geq 85y$    | 8.7%             | 7.9%        | 9.6%        | Beta                 |
| Prevalence of influenza A (H3N2)                                                 | 44.0%            | 20.9%       | 72.9%       | Beta                 |
| Prevalence of influenza A (H1N1)                                                 | 16.5%            | 0.5%        | 41.9%       | Beta                 |
| Probability of complication for low-risk inpatient with influenza in 65-74y      | 3.2%             | 2.9%        | 3.5%        | Beta                 |
| Probability of complication for low-risk inpatient with influenza in 75-84y      | 2.9%             | 2.6%        | 3.2%        | Beta                 |
| Probability of complication for low-risk inpatient with influenza in $\geq 85y$  | 4.0%             | 3.6%        | 4.4%        | Beta                 |
| Probability of complication for high-risk inpatient with influenza in 65-74y     | 7.8%             | 7.0%        | 8.6%        | Beta                 |
| Probability of complication for high-risk inpatient with influenza in 75-84y     | 10.3%            | 9.2%        | 11.3%       | Beta                 |

|                                                                                  |       |       |       |        |
|----------------------------------------------------------------------------------|-------|-------|-------|--------|
| Probability of complication for high-risk inpatient with influenza in $\geq 85y$ | 17.4% | 15.7% | 19.2% | Beta   |
| Relative risk of influenza for patient with high-risk in 65-74y (1.0 - 1.34)     | 1.00  | 1.00  | 1.34  | Normal |
| Relative risk of influenza for patient with high-risk in 75-84y                  | 1.00  | 1.00  | 1.34  | Normal |
| Relative risk of influenza for patient with high-risk in $\geq 85y$              | 1.00  | 1.00  | 1.34  | Normal |

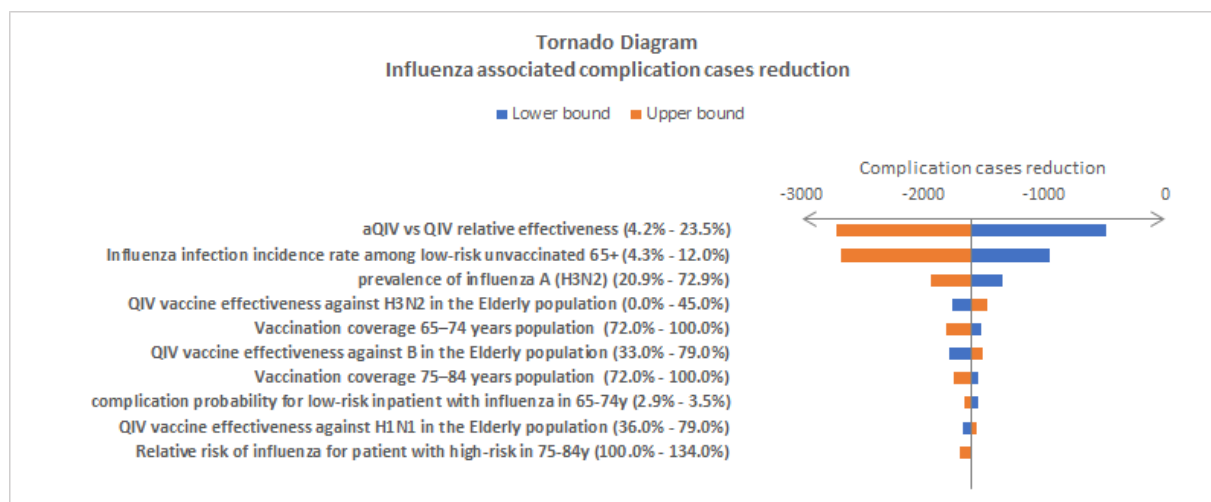

**Figure S1:** The top 10 most influential factors driving influenza associated complication case reduction in the comparison of using aQIV vs using QIV in NIP for the elderly in South Korea. The values in the parenthesis are the minimum and maximum values tested in the DSA.

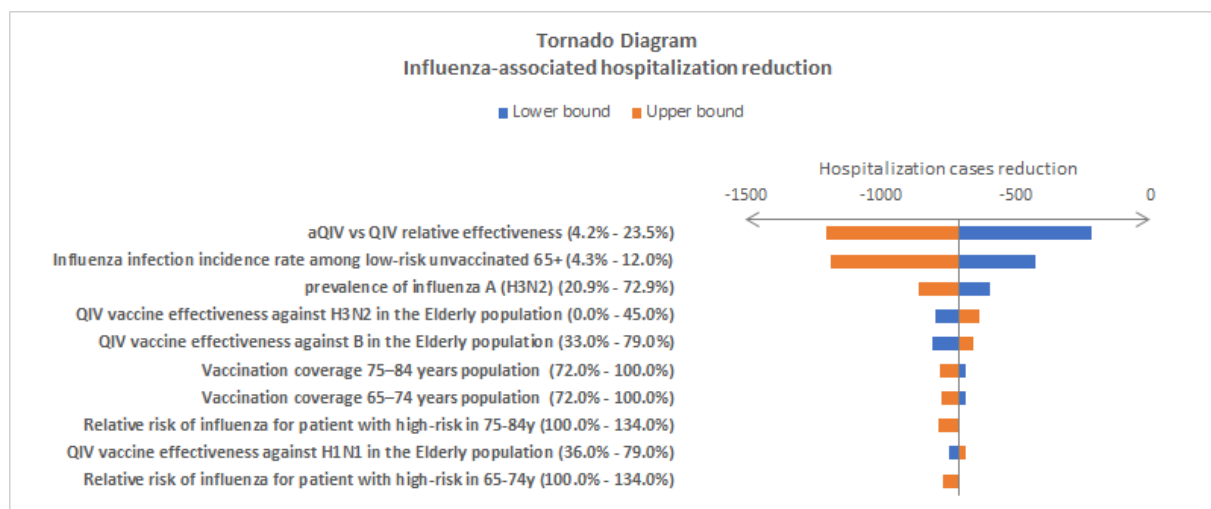

**Figure S2:** The top 10 most influential factors driving influenza associated hospitalization reduction in the comparison of using aQIV vs using QIV in NIP for the elderly in South Korea. The values in the parenthesis are the minimum and maximum values tested in the DSA.

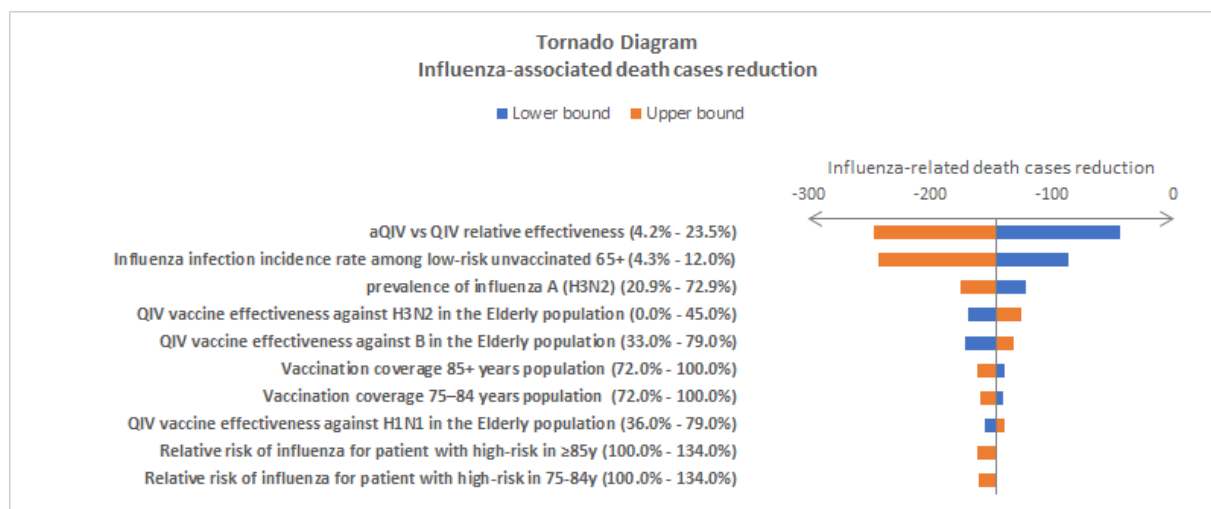

**Figure S3:** The top 10 most influential factors driving influenza associated death reduction in the comparison of using aQIV vs using QIV in NIP for the elderly in South Korea. The values in the parenthesis are the minimum and maximum values tested in the DSA.

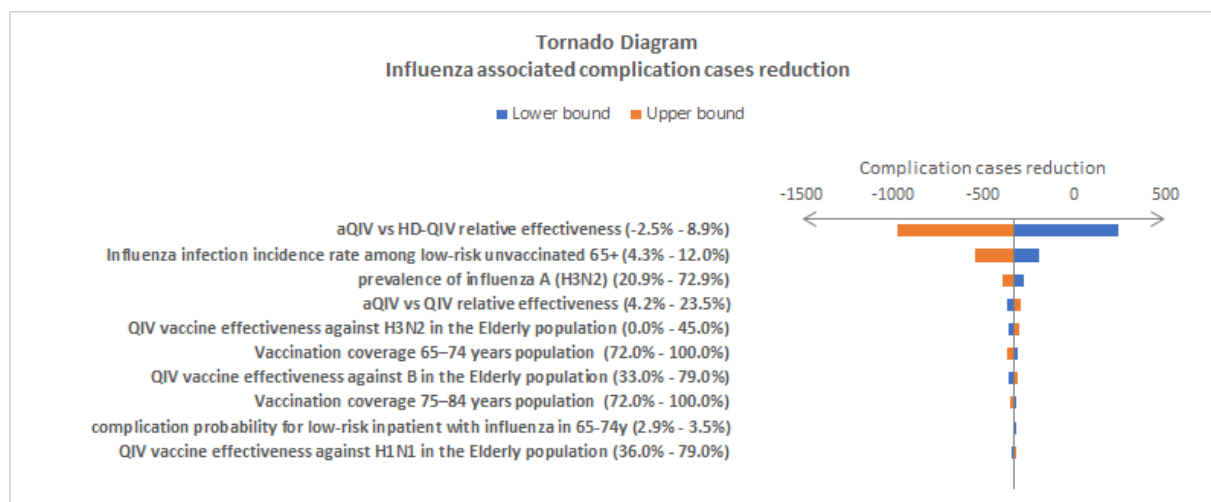

**Figure S4:** The top 10 most influential factors driving influenza associated complication reduction in the comparison of using aQIV vs using HD-QIV in NIP for the elderly in South Korea. The values in the parenthesis are the minimum and maximum values tested in the DSA.



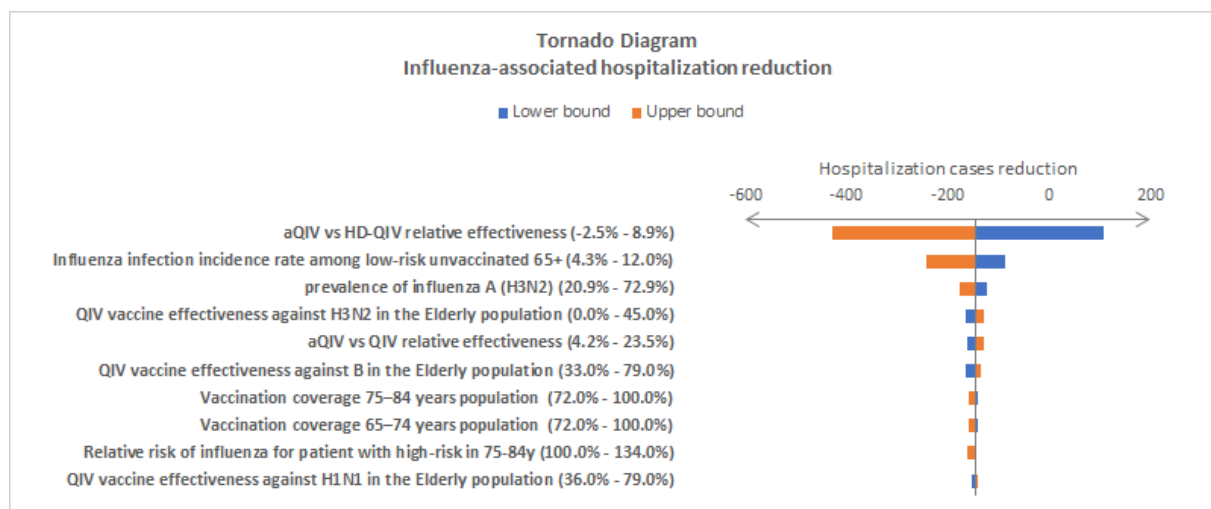

**Figure S5:** The top 10 most influential factors driving influenza associated hospitalization reduction in the comparison of using aQIV vs using HD-QIV in NIP for the elderly in South Korea. The values in the parenthesis are the minimum and maximum values tested in the DSA.

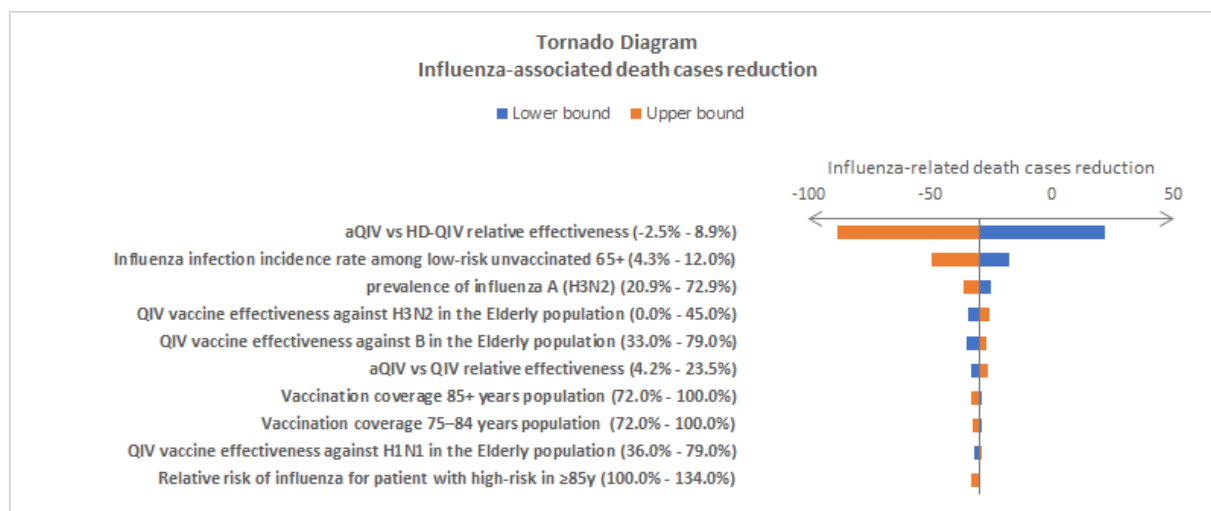

**Figure S6:** The top 10 most influential factors driving influenza associated death reduction in the comparison of using aQIV vs using HD-QIV in NIP for the elderly in South Korea. The values in the parenthesis are the minimum and maximum values tested in the DSA.

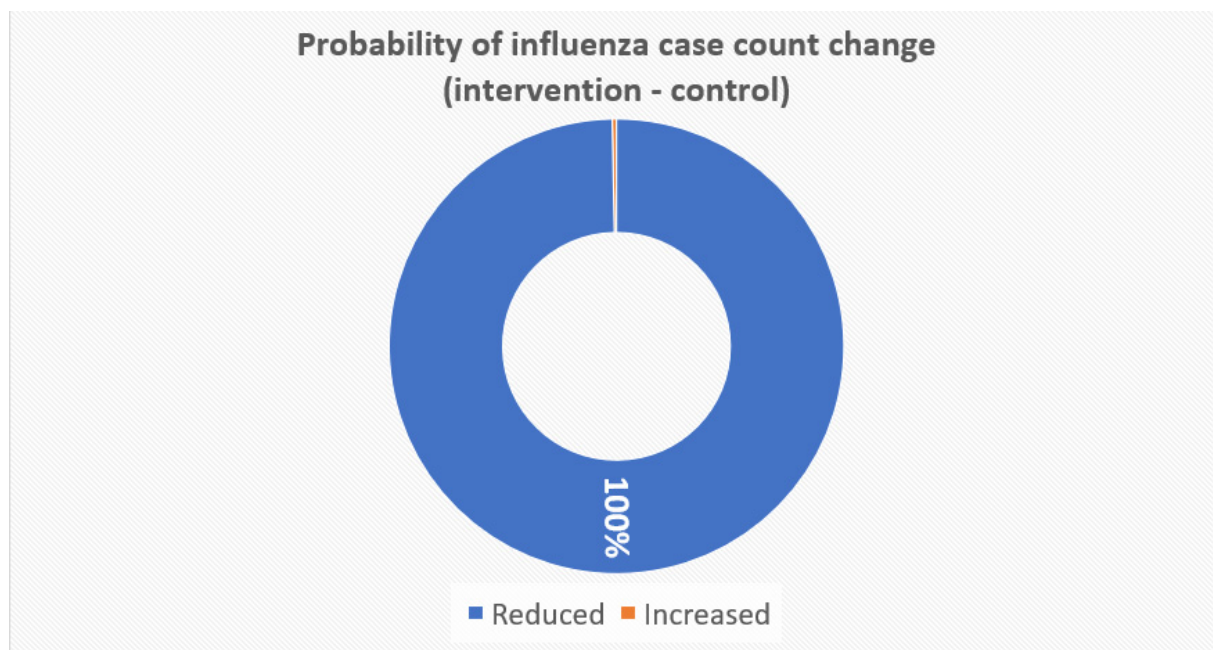

**Figure S7:** PSA case count comparison of using aQIV vs using QIV in NIP for the elderly population in South Korea.

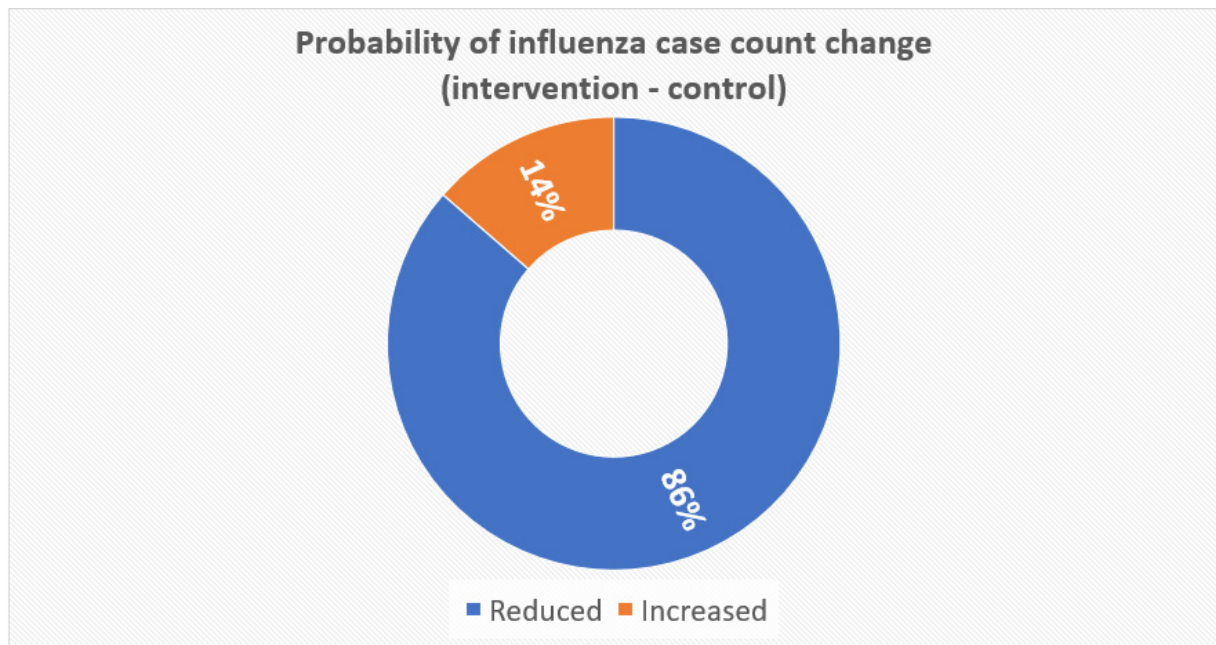

**Figure S8:** PSA case count comparison of using aQIV vs using HD-QIV in NIP for the elderly population in South Korea.

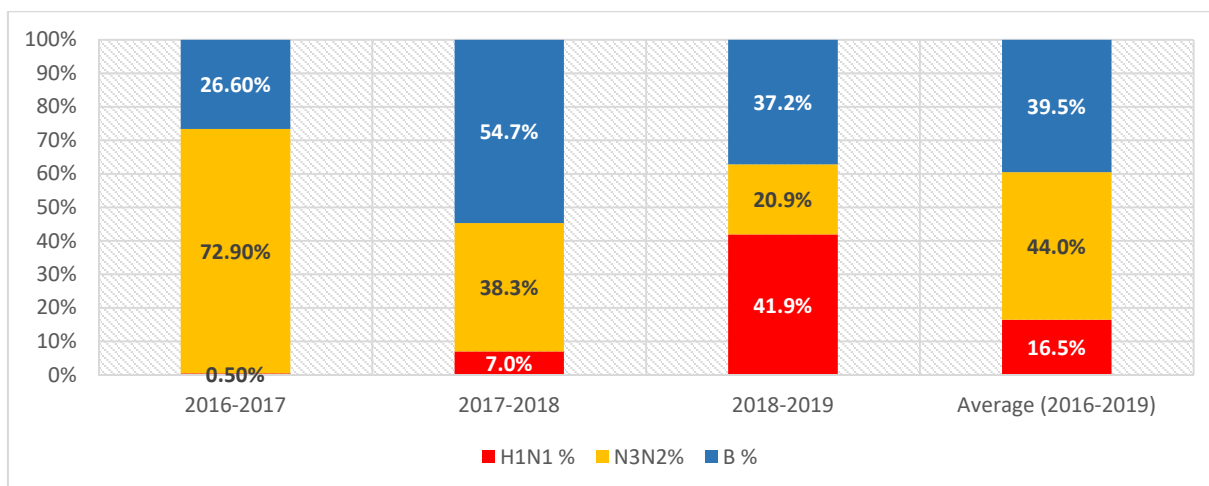

**Figure S9.** Influenza circulation in South Korea. Influenza surveillance data from the Korea Disease Control and Prevention Agency (KDCA) [19,20]
